# Supplementary material for: A rhodamine coumarin-derived fluorescence probe that selectively detects Fe3+ and measures radiation doses
Source: Royal Society of Chemistry journal article supplement (doi:10.1039/d3ay01875j), 2023-12-21
Supplement: d3ay01875j1.pdf [file d3ay01875j1.pdf]

## Supporting Information

### **A rhodamine coumarin-derived fluorescence probe that selectively detects Fe<sup>3+</sup> and measures radiation doses**

Danni Qin,<sup>a</sup> Yaqi Han,<sup>a</sup> Hao Jiang,<sup>a,b</sup> and Liang Hu<sup>a, \*</sup>

a. State Key Laboratory of Radiation Medicine and Protection, Collaborative Innovation Center of Radiological Medicine of Jiangsu Higher Education Institutions, and School for Radiological and Interdisciplinary Sciences (RAD-X), Soochow University, Suzhou, China.

b. Key Laboratory of Polymeric Material Design and Synthesis for Biomedical Function, College of Chemistry, Chemical Engineering and Materials Science, Soochow University, Suzhou, China.

\* Corresponding author, Email: [huliang@suda.edu.cn](mailto:huliang@suda.edu.cn)

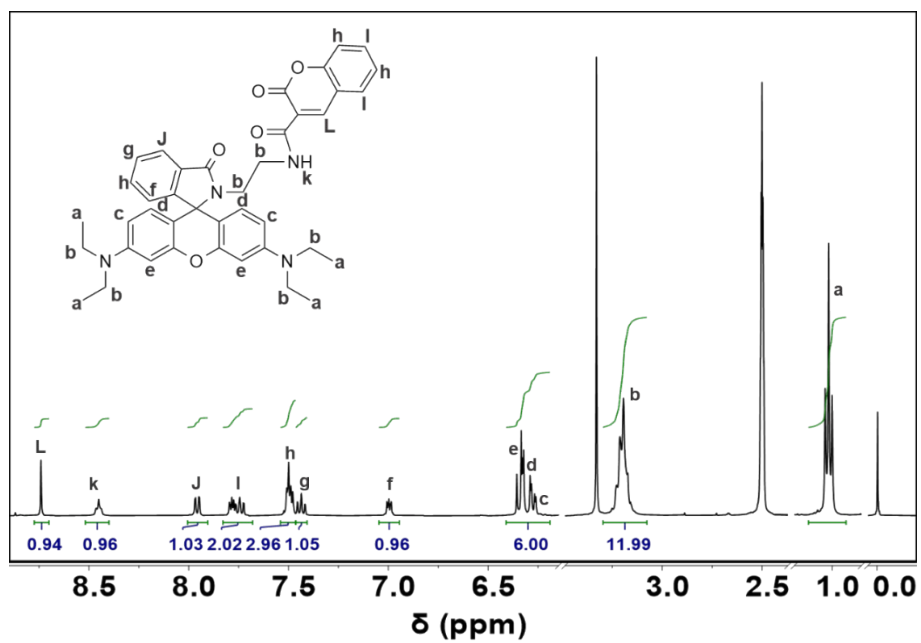

**Figure S1.** <sup>1</sup>H NMR spectrum of REC.

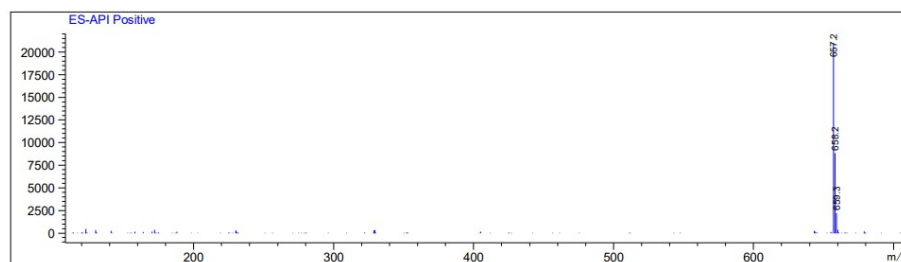

**Figure S2.** LCMS spectrum of REC.

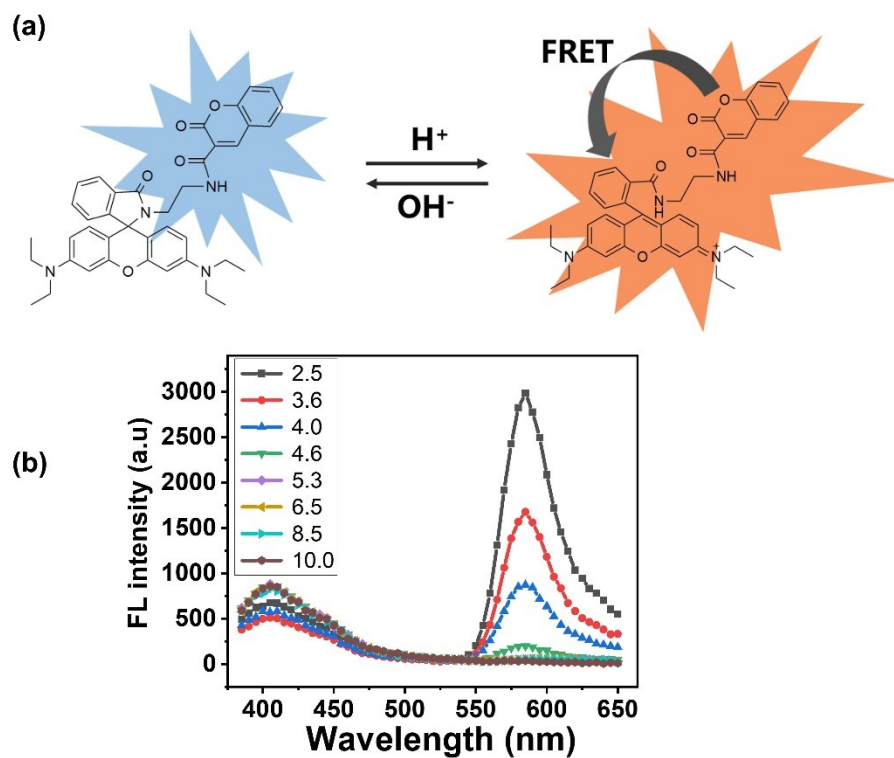

Figure S3. (a) Schematic illustration of the mechanism and (b) the fluorescence spectra of REC at different pHs.

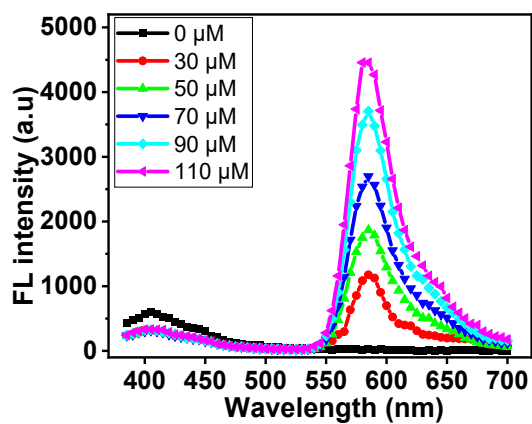

Figure S4. Fluorescence spectra of REC as a function of increasing  $Fe^{3+}$  concentration.

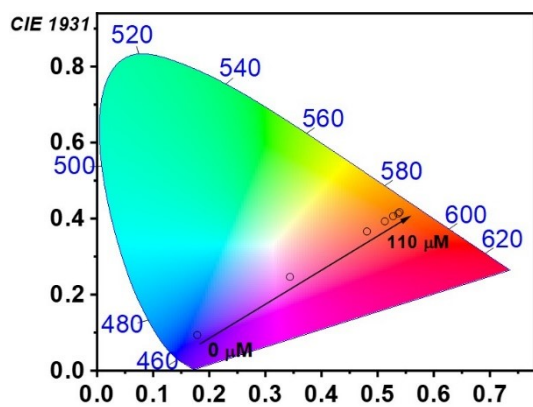

Figure S5. CIE 1931 of REC as a function of increasing  $\text{Fe}^{3+}$  concentration.

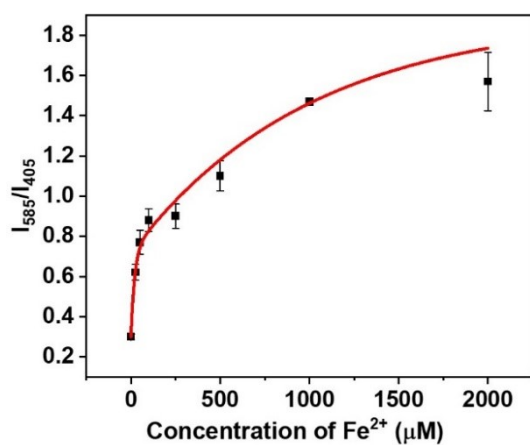

Figure S6. Change in  $I_{585}/I_{405}$  as a function of increasing  $\text{Fe}^{2+}$  concentration.

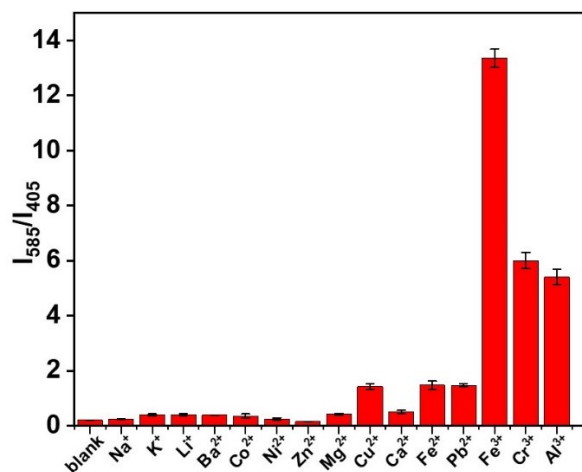

Figure S7.  $I_{585}/I_{405}$  of REC solution responding to different metal ions. Interfering metal ions:  $1100 \mu\text{M}$ ,  $\text{Fe}^{3+}$ :  $110 \mu\text{M}$ .

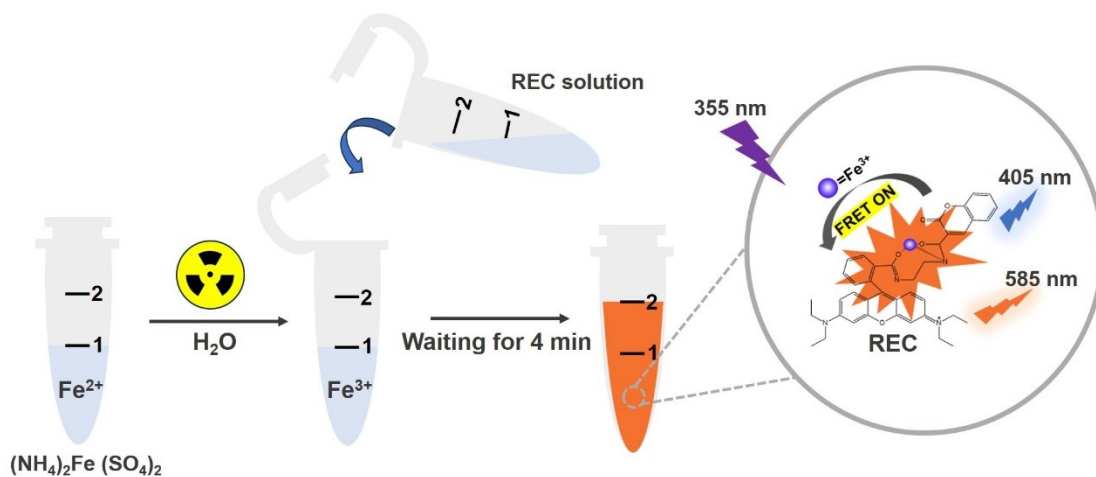

Figure S8. Schematic illustration of the mechanism of REC for sensing X-ray doses.

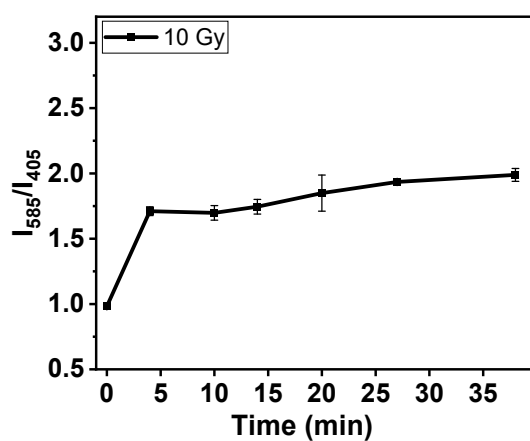

Figure S9. Reaction kinetics of REC probe with 10 Gy irradiated Fe<sup>2+</sup>.

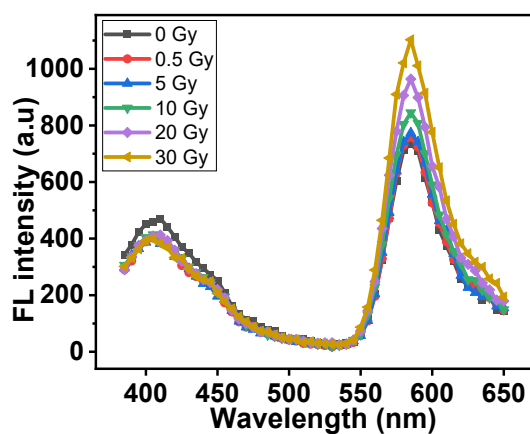

Figure S10. Fluorescence spectra of REC probe with different X-ray doses.

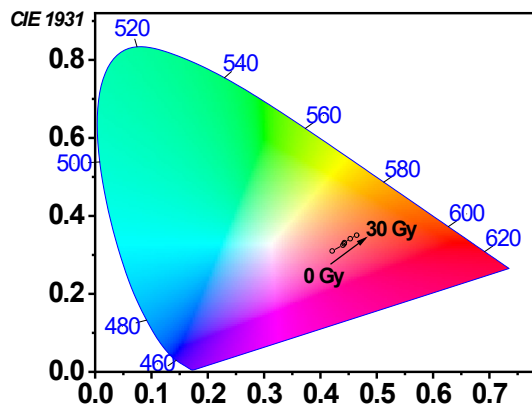

Figure S11. CIE 1931 plot of REC probe with different X-ray doses.
